# Supplementary material
Source: ML conference proceedings conference paper supplement (https://openreview.net/forum?id=a69zct3BkY)

Value Distribution Before and After Edit.

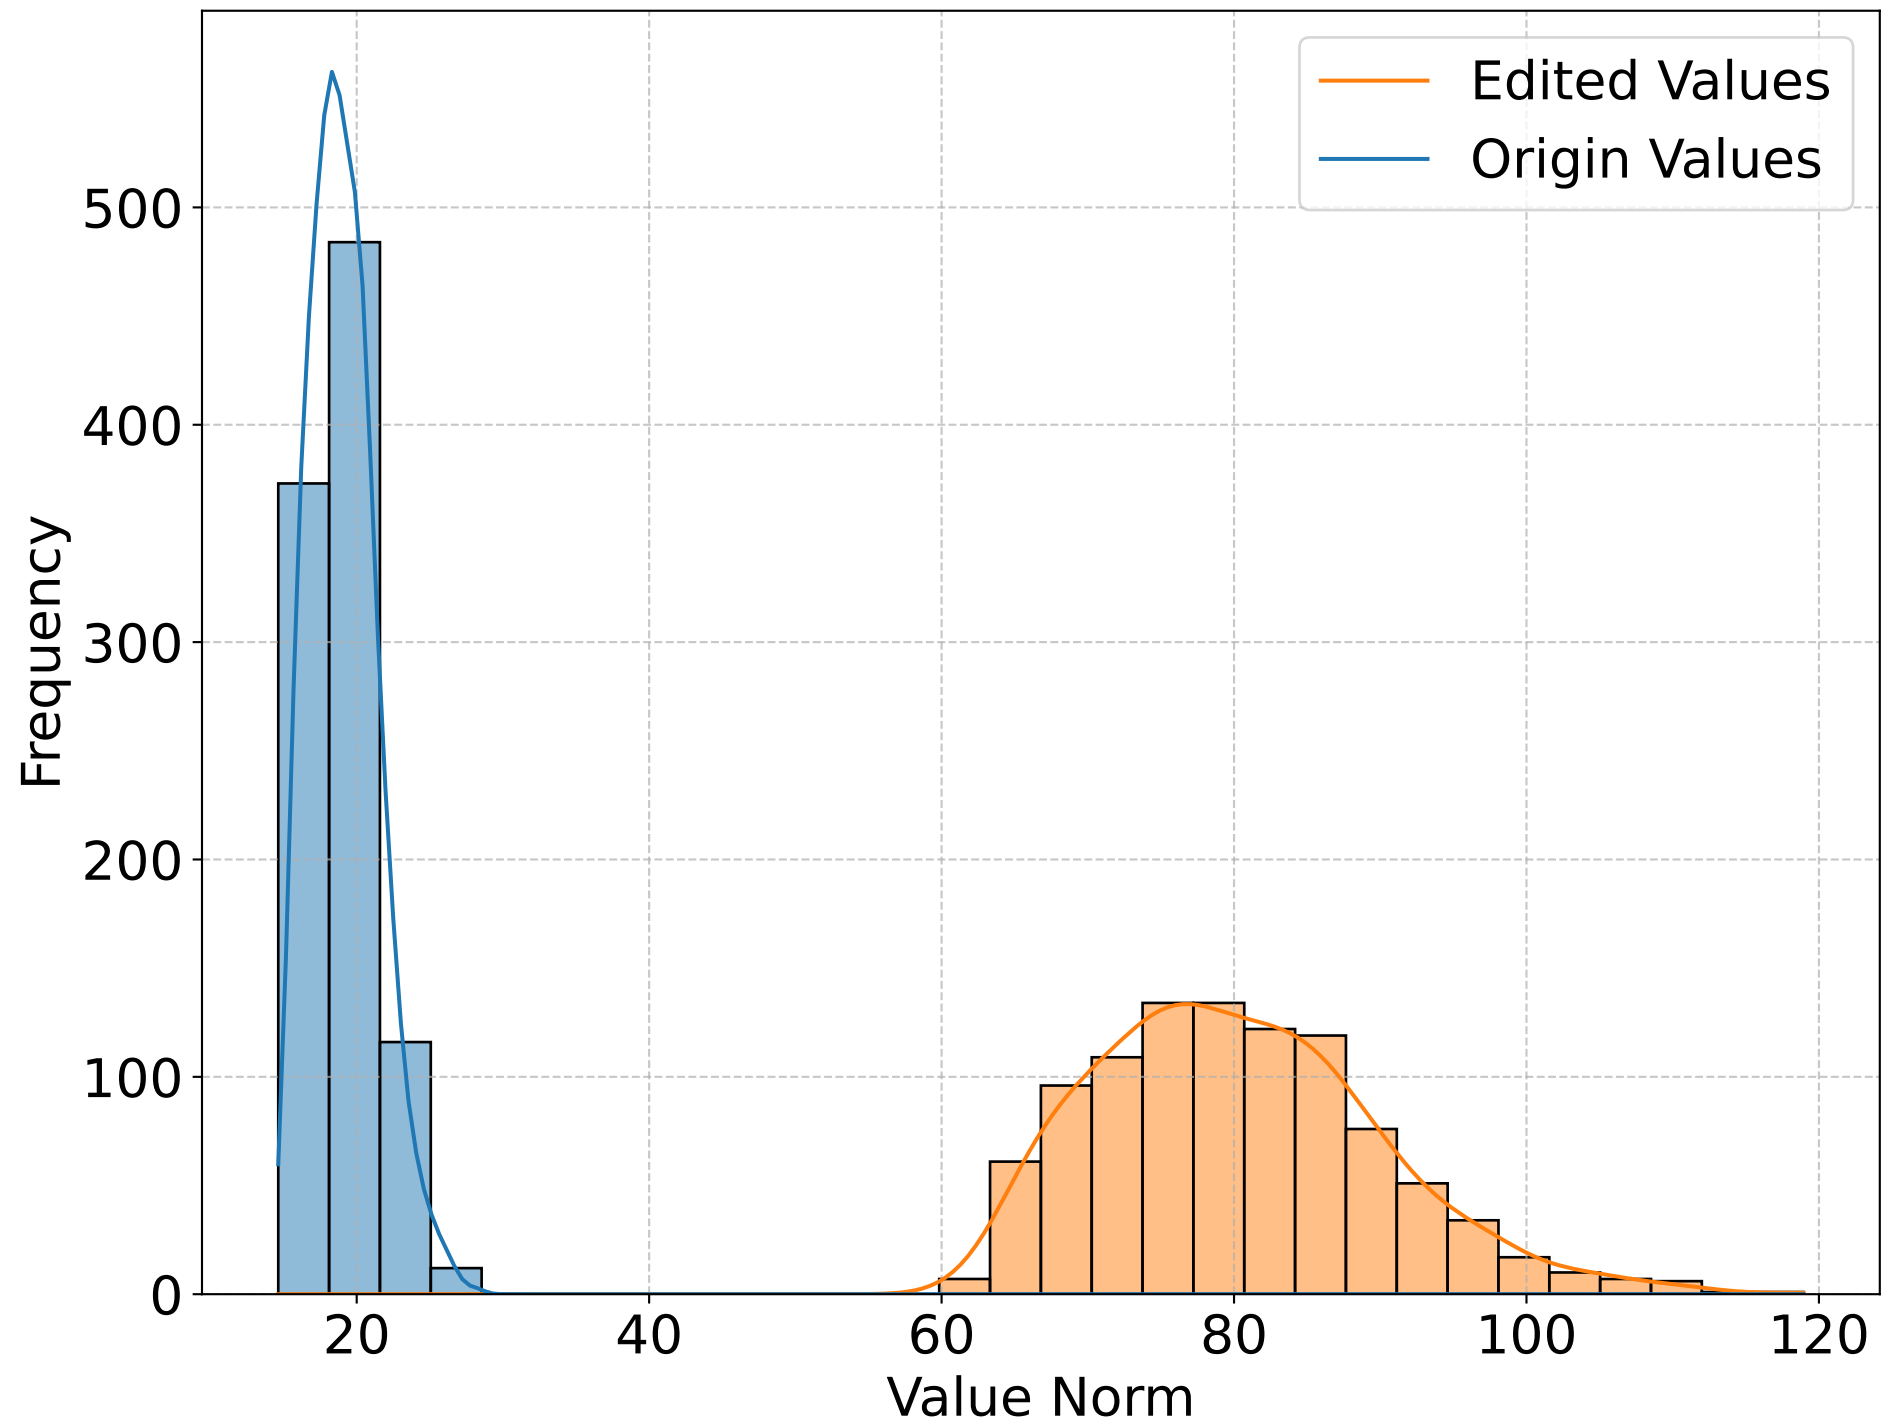

Supplement: supplementary_material [file attachment]

Distribution of  $k_1 C^{-1} k_2$  on  
Rephrased Subjects' Keys

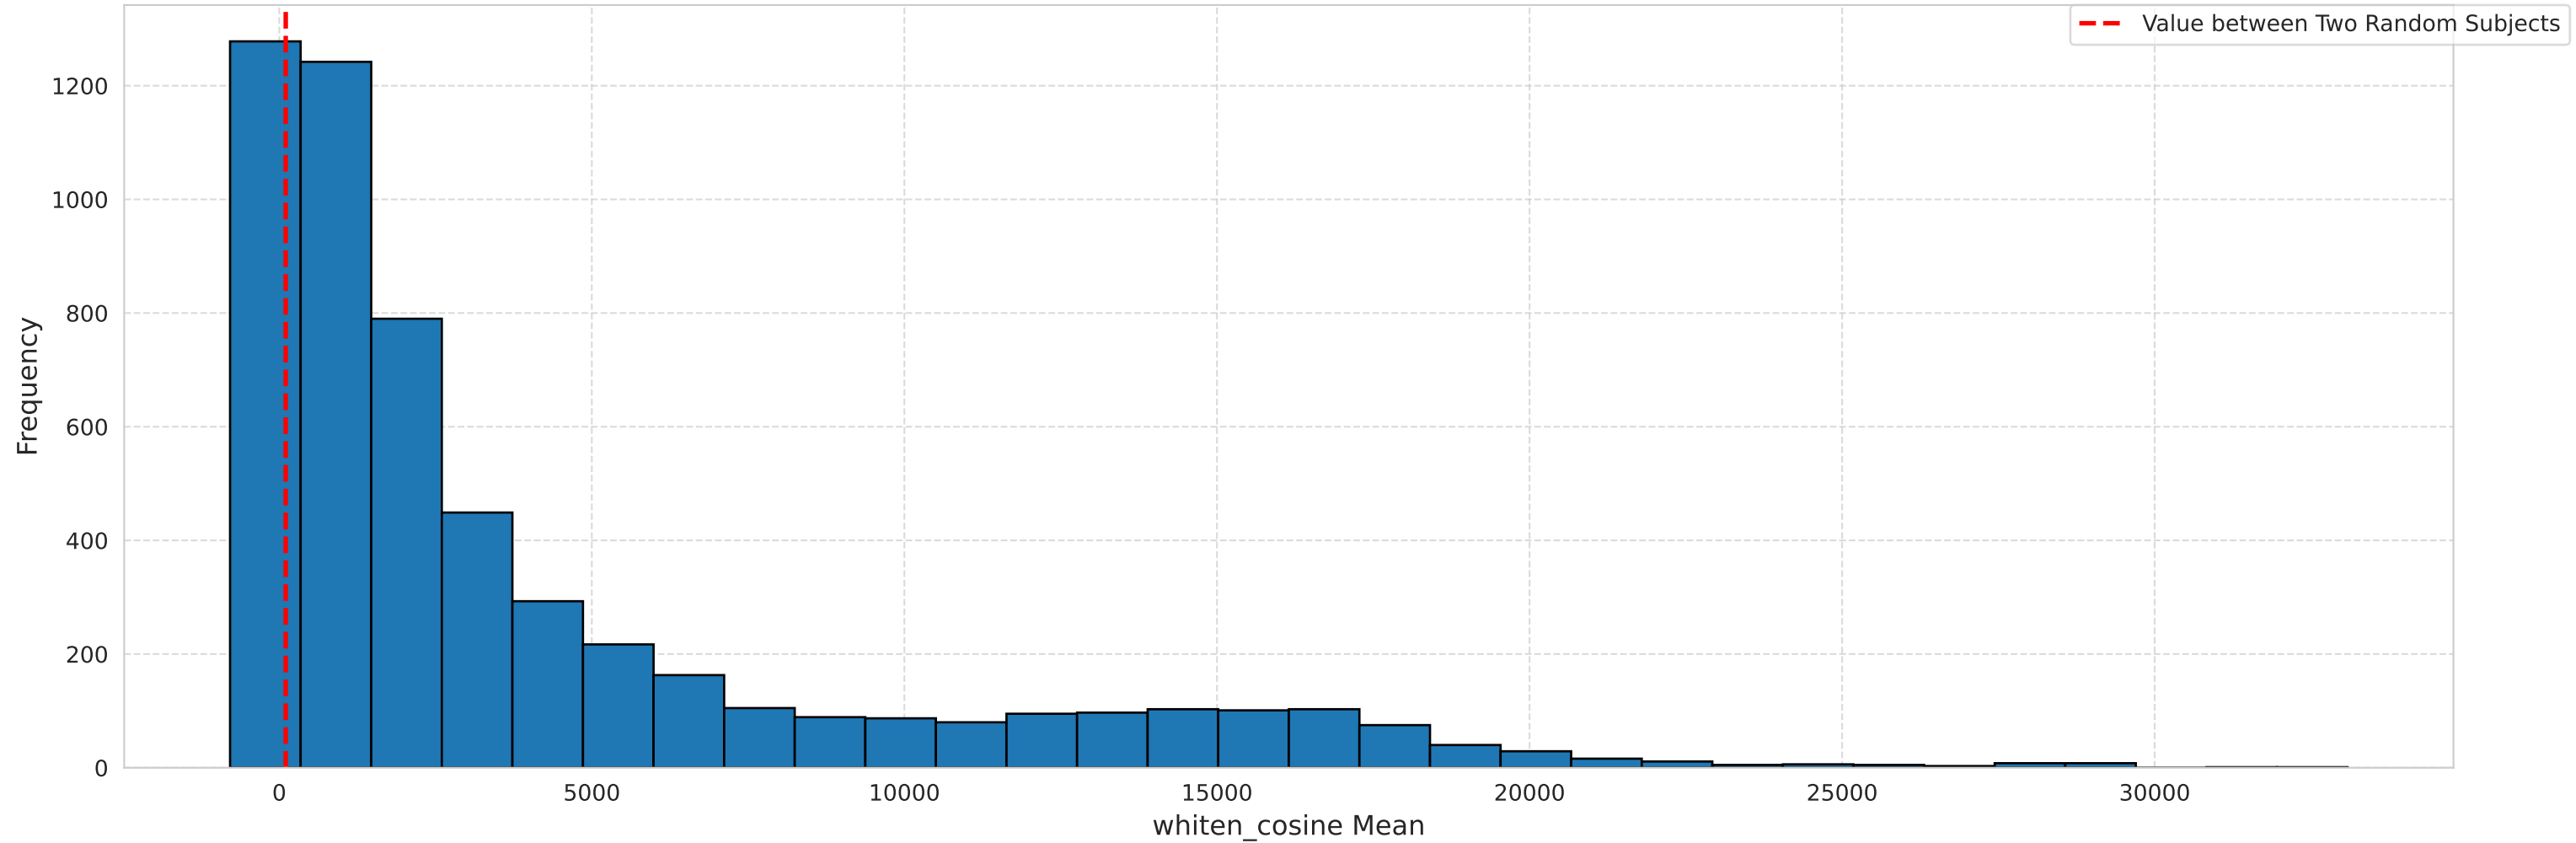

Supplement: supplementary_material [file attachment]

# PCA visualization of keys for same subject

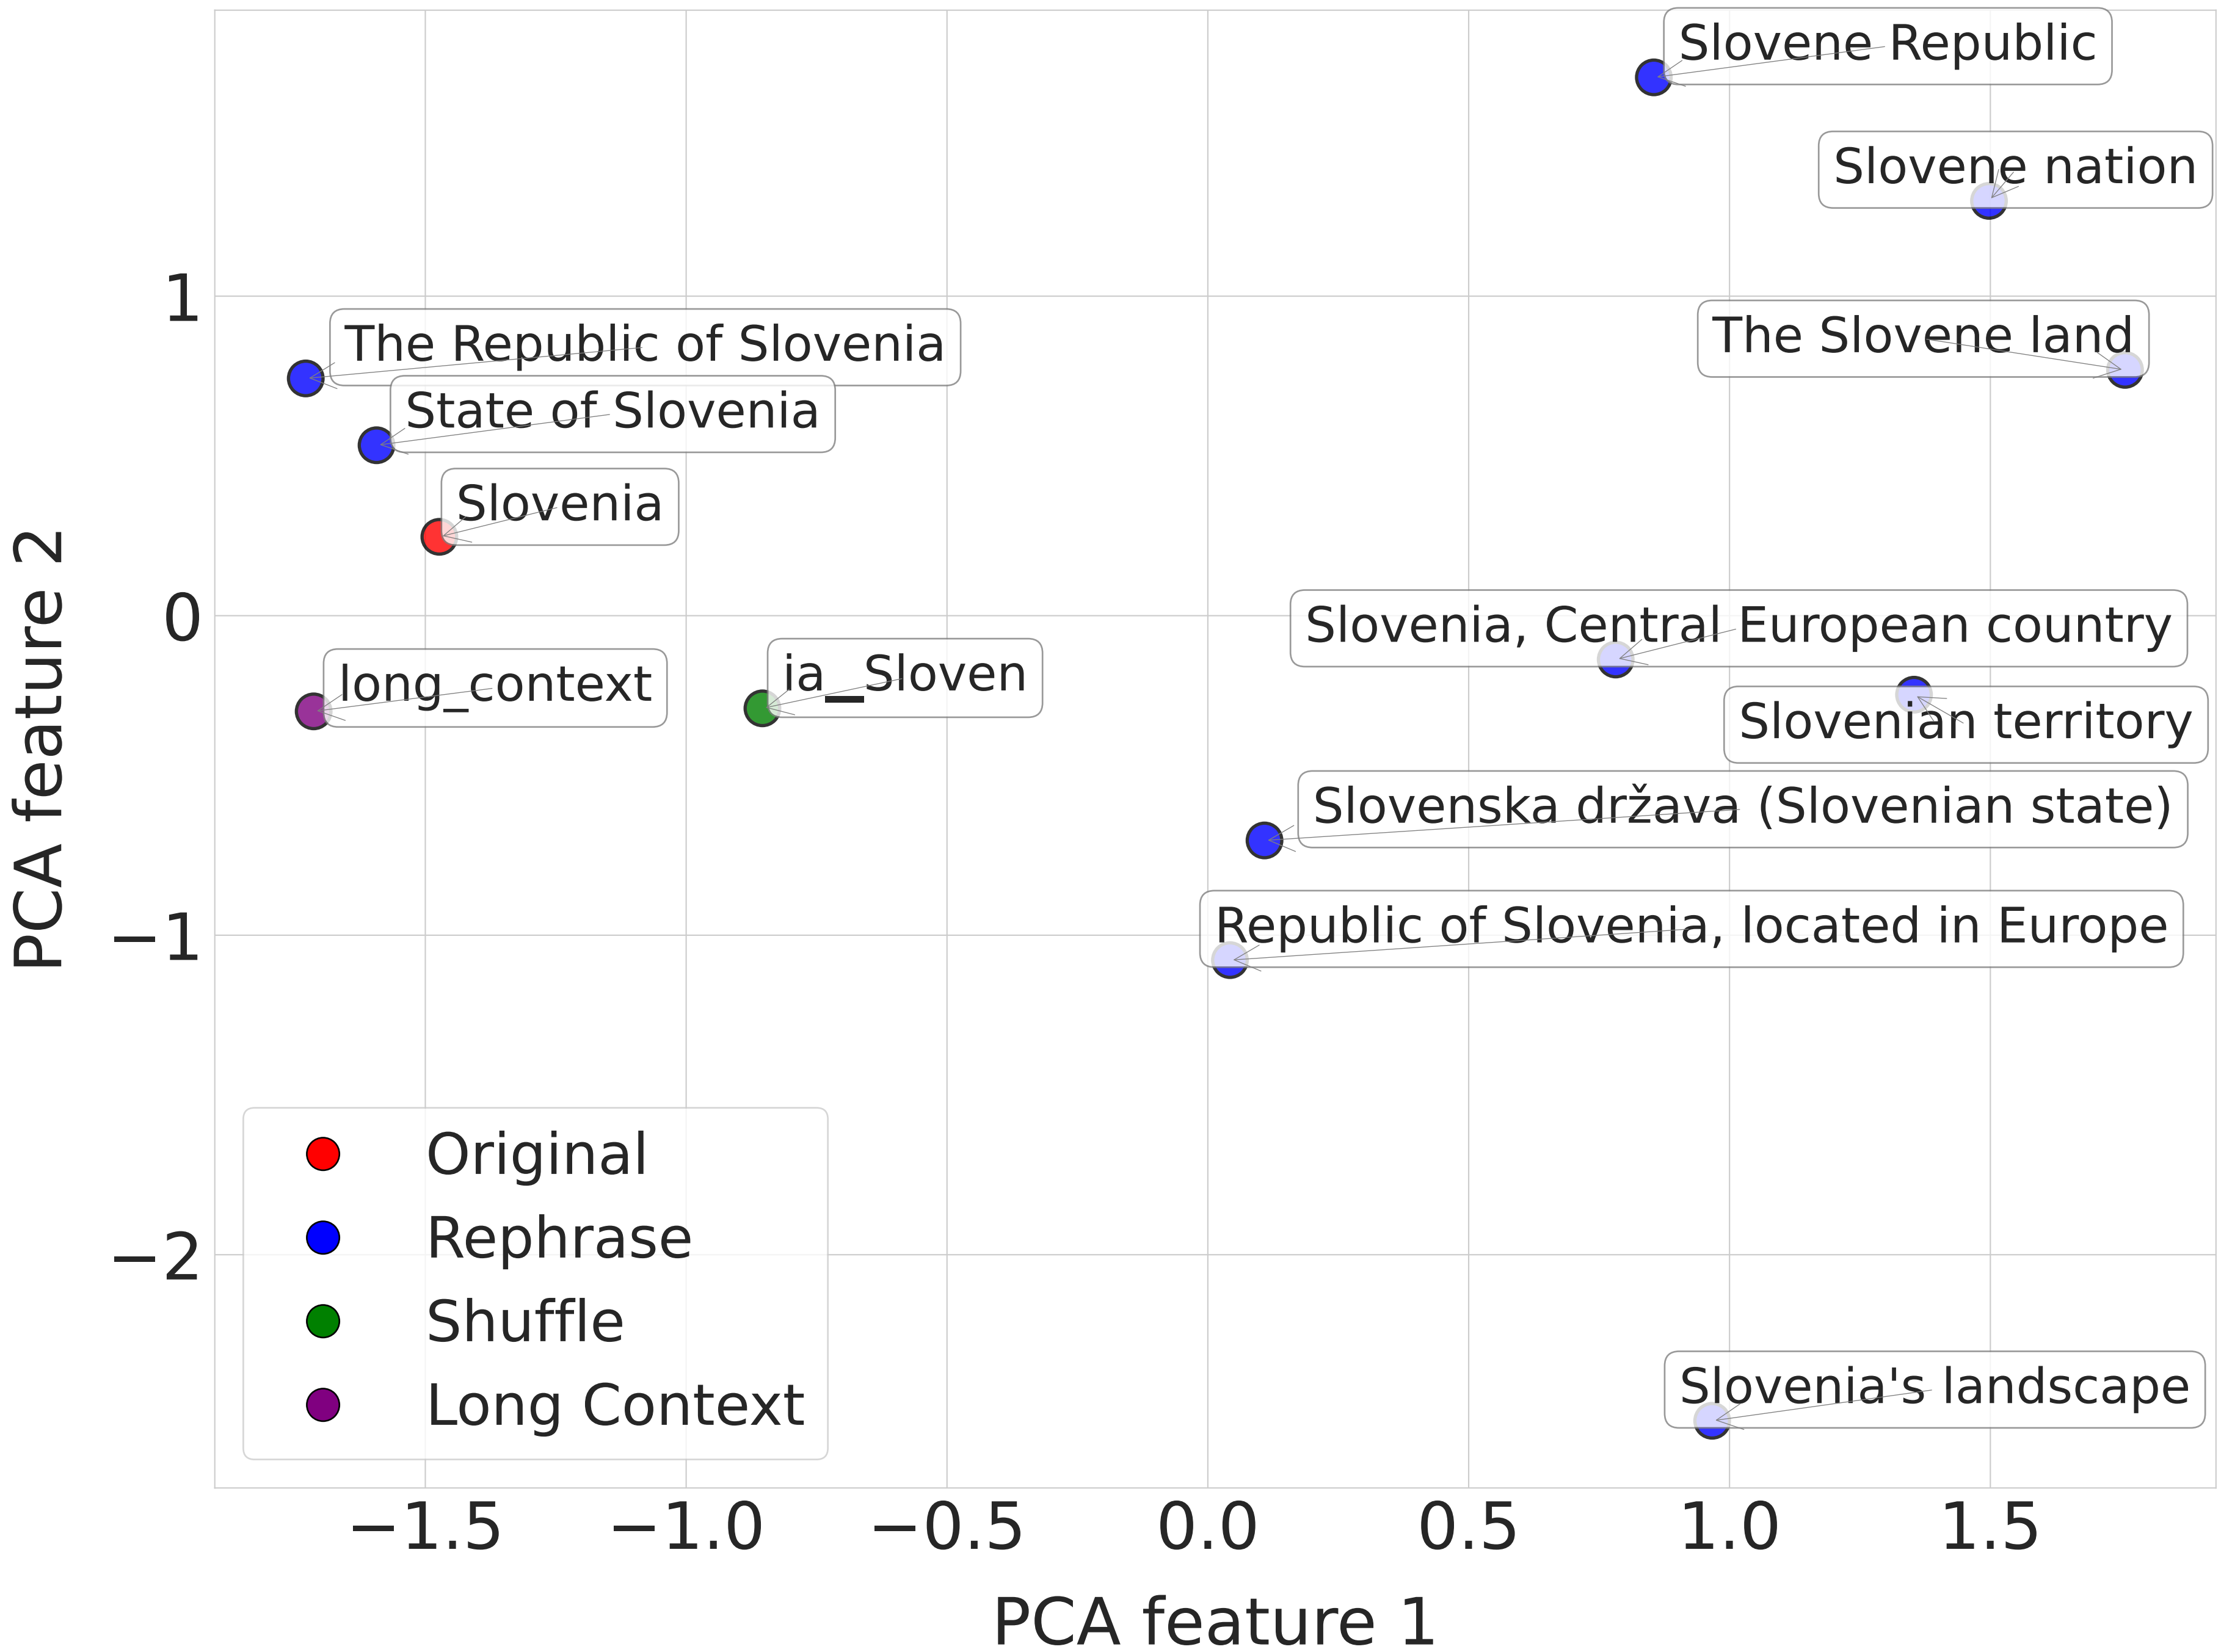

Supplement: supplementary_material [file attachment]

Distribution of Mean on  
Rephrased Subjects' Representations

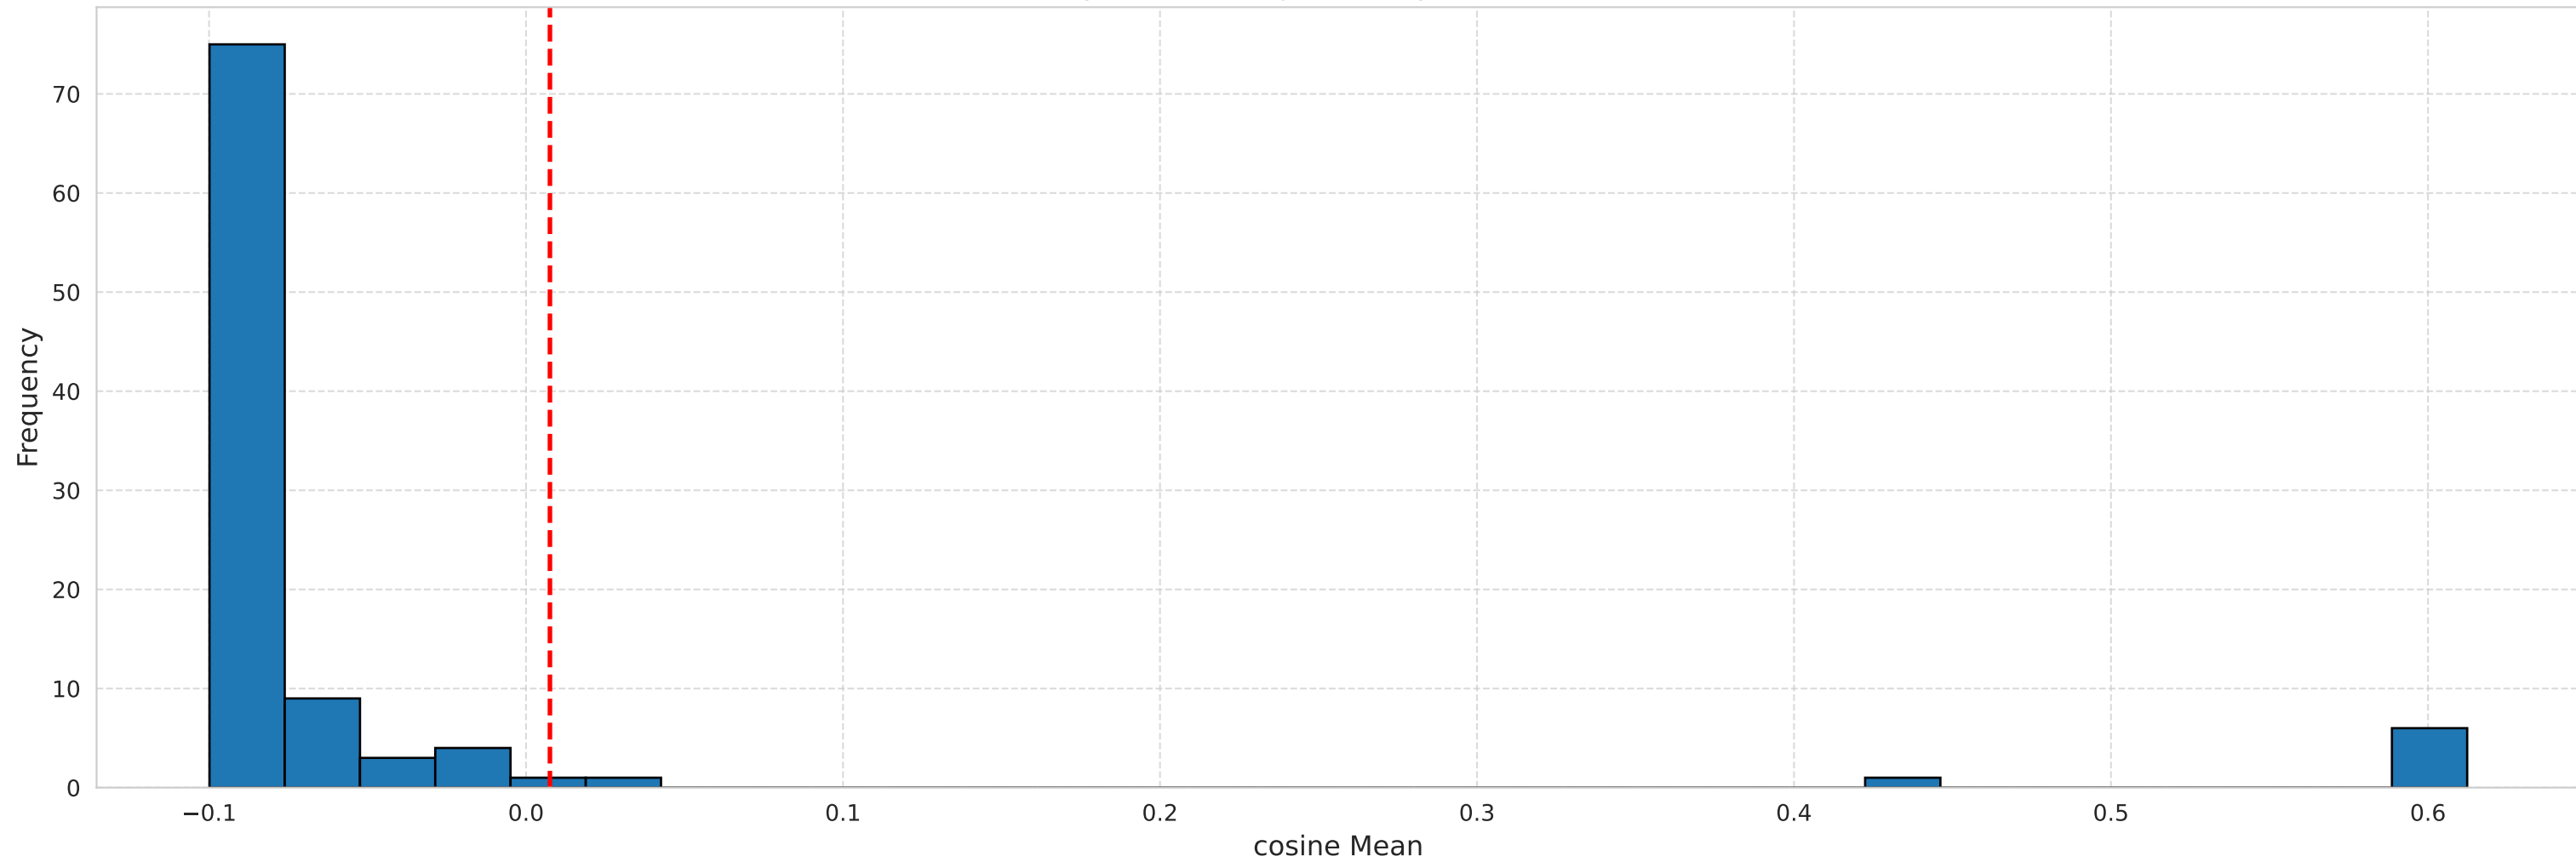

Supplement: supplementary_material [file attachment]

3685.99 Distribution of Top 10 Unrelated Keys

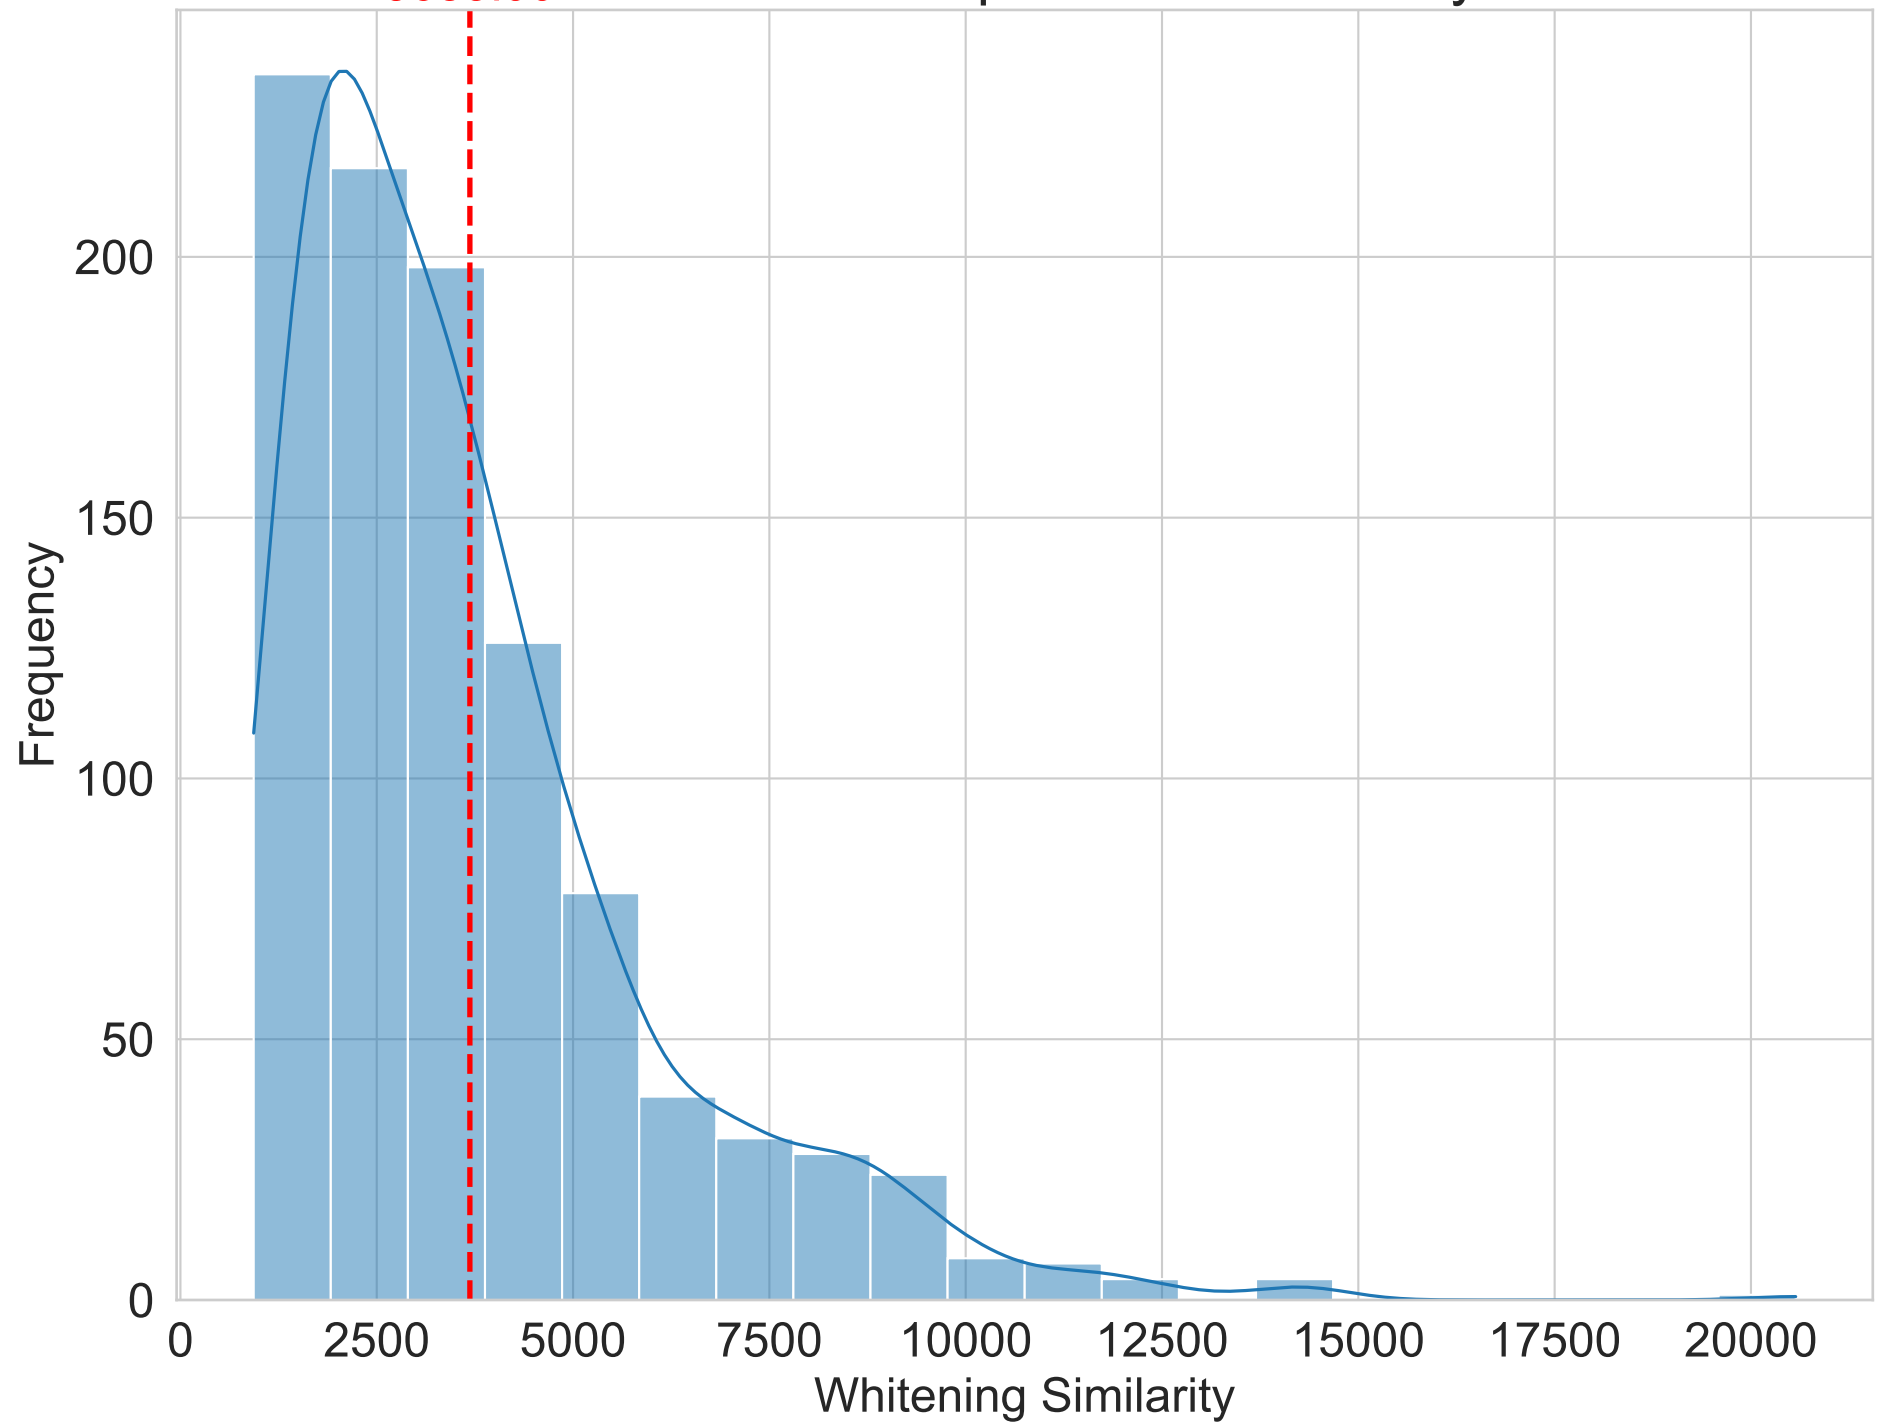

Supplement: supplementary_material [file attachment]

# Distribution of $k_1 C^{-1} k_2$ on Rephrased Keys

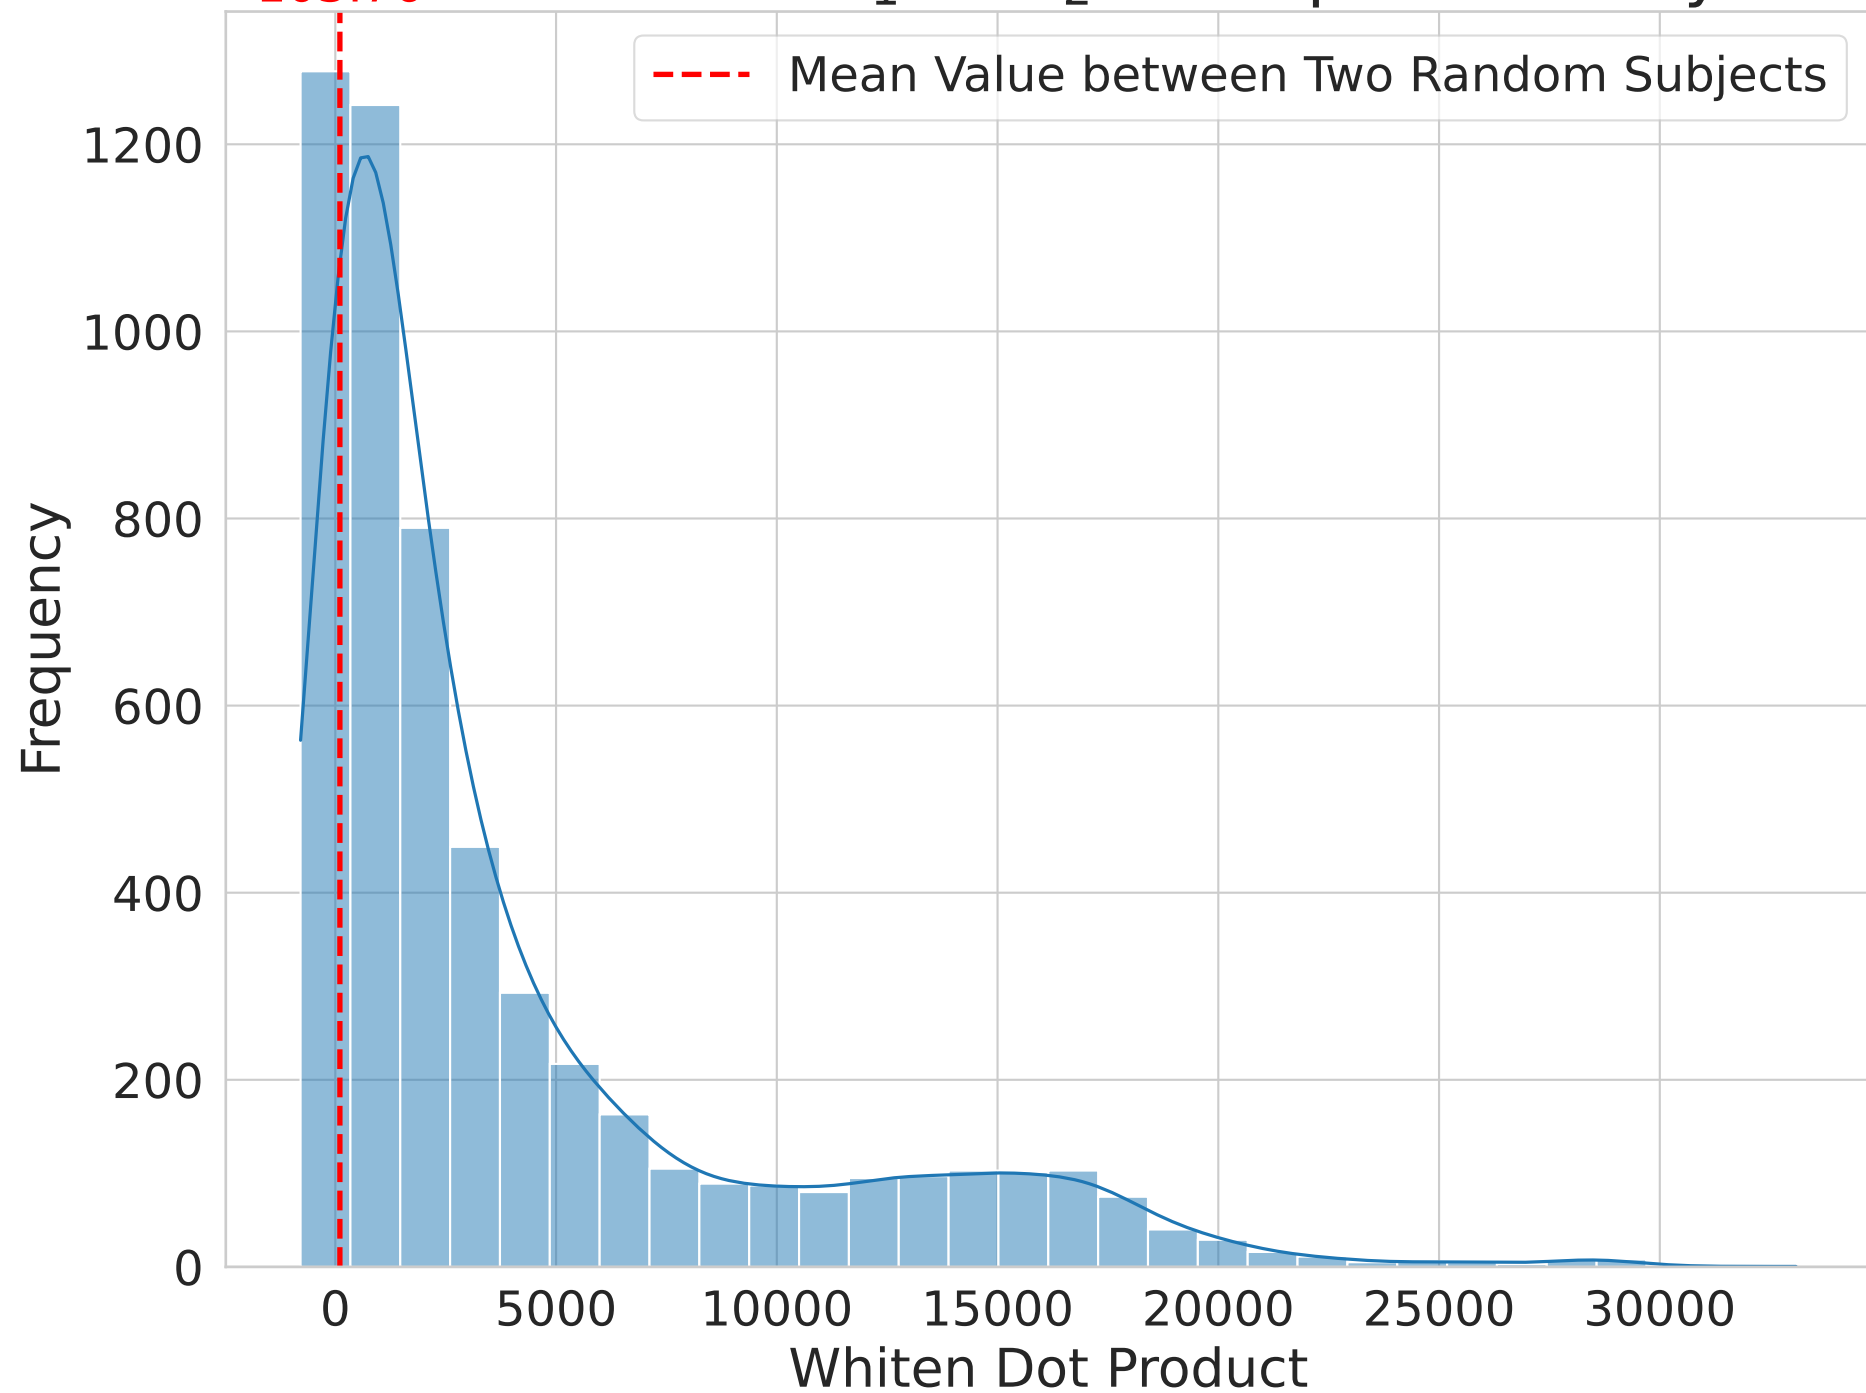

Supplement: supplementary_material [file attachment]

# tsne visualization of keys

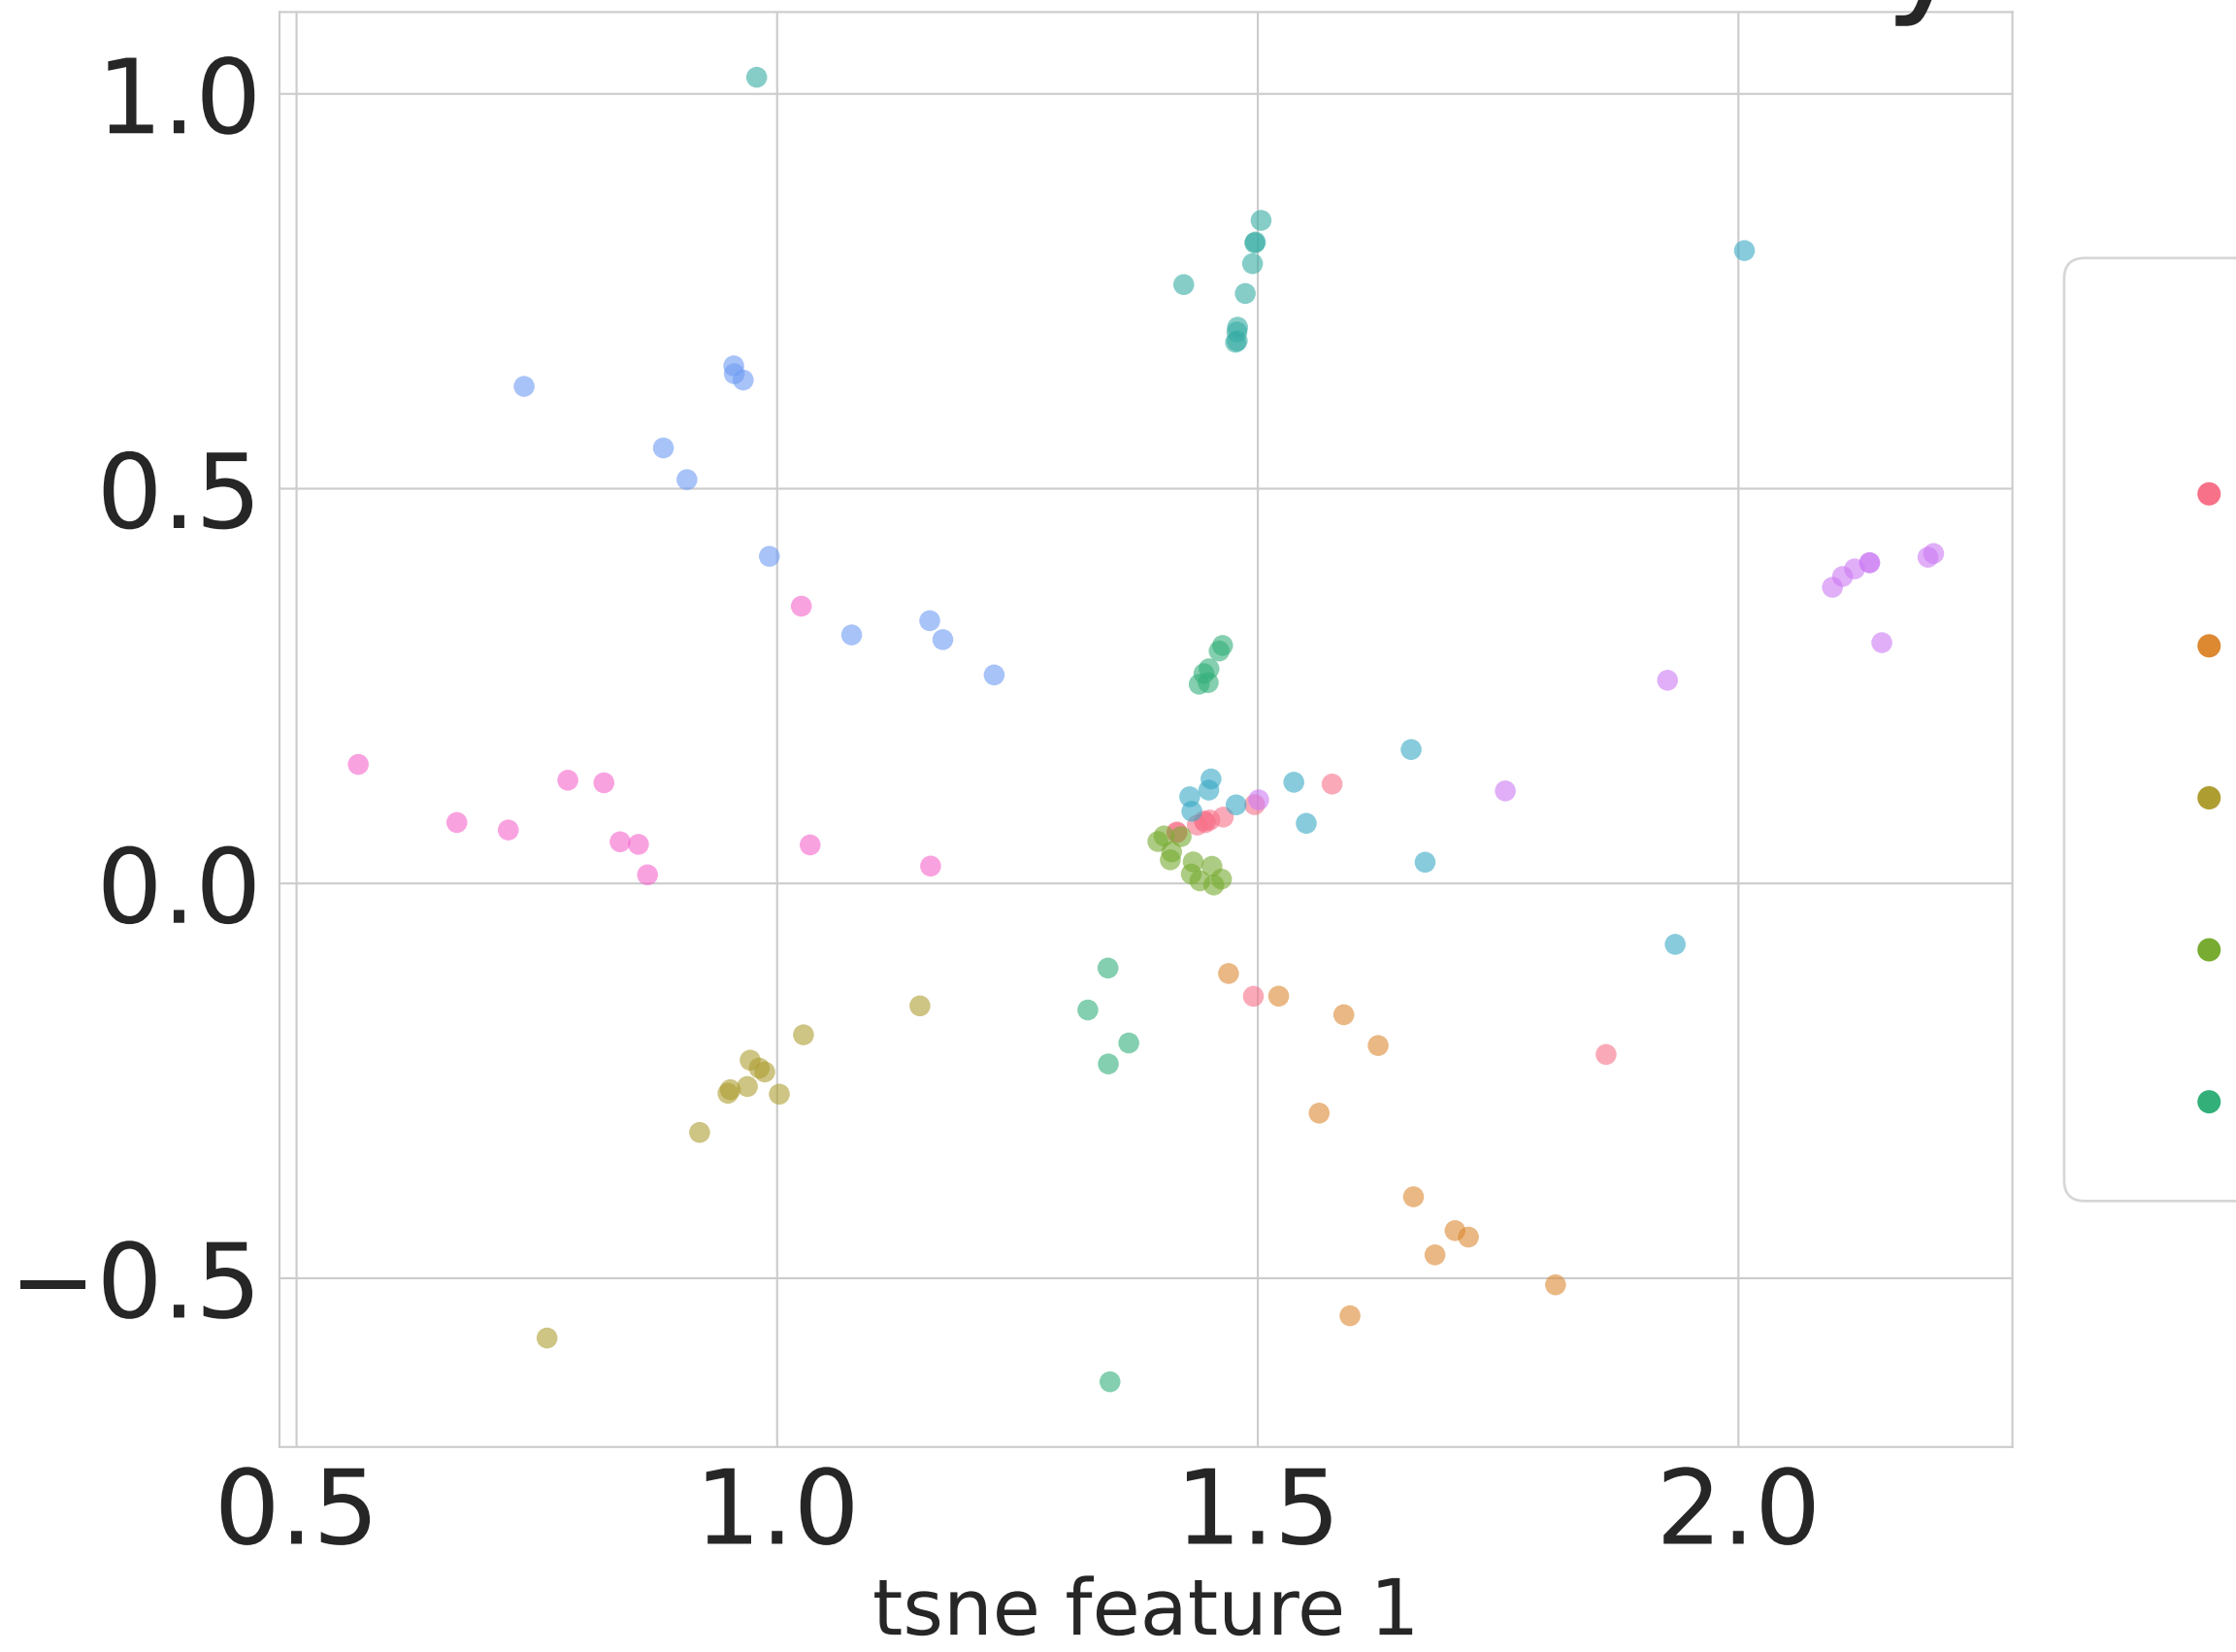

Supplement: supplementary_material [file attachment]
